# Supplementary material
Source: PubMed Central journal article supplement (PMC5148464)
Supplement: ejhg2014273x1.pdf [file ejhg2014273x1.pdf]

**Supplementary Table 1. The presence of a shared haplotype supports a founder effect in the genetically isolated population.** For all samples, fetuses and parents, of which enough DNA was available, genotyping was performed for eight STR markers and eight SNPs by standard methods. SNPs were genotyped by Sanger sequencing. SNPs were selected on the basis of the SNP array data from two fetuses. SNPs which were homozygous for the minor allele with a relative low frequency in controls were selected. Allele numbers for STR markers are derived from Centre d'Étude du Polymorphisme Humain; CEPH (www.cephb.fr). As a control DNA from CEPH sample 1347-2 was included. The shared haplotype is indicated in orange. If no data was obtained, cells are left empty.

| Marker name   | Marker type | Genomic location (chromosome 9; Hg19) | Individual > Affection status > | father | mother | fetus 1 | father fetus 2 and 3 | mother fetus 2 and 3 | fetus 4 | fetus 5 | father fetus 6 | mother fetus 6 | fetus 6 | father fetus 7 | fetus 7 | father fetus 8 | mother fetus 8 | sibling fetus 8 | father fetus 9 | mother fetus 9 | father fetus 10 and 11 | mother fetus 10 and 11 | fetus 10 | fetus 11 | fetus 12 | control CEPH 1347-2 |      |
|---------------|-------------|---------------------------------------|---------------------------------|--------|--------|---------|----------------------|----------------------|---------|---------|----------------|----------------|---------|----------------|---------|----------------|----------------|-----------------|----------------|----------------|------------------------|------------------------|----------|----------|----------|---------------------|------|
|               |             |                                       |                                 | U      | U      | fetus 1 | U                    | U                    | U       | A       | A              | U              | U       | A              | U       | A              | U              | U               | U              | U              | U                      | U                      | U        | U        | A        | A                   | A    |
| D9S1784       | STR         | 108,038,745                           |                                 | 6 11   | 8 7    |         | 8 8                  | 12 5                 | 12 7    | 3 5     | 12 11          | 11 5           | 12 11   | 12 5           | 12 5    | 4 8            | 12 8           | 12 8            | 8 3            | 7 5            | 12 4                   | 4 8                    | 12 4     | 12 4     | 8 5      | 4 13                |      |
| D9S1677       | STR         | 111,937,590                           |                                 | 8 1    | 8 9    |         | 8 2                  | 8 4                  | 8 8     | 8 8     | 8 2            | 8 2            | 8 8     | 8 11           | 12 5    | 8 4            | 8 9            | 8 4             | 8 1            | 8 4            | 8 1                    | 8 4                    | 8 8      | 8 8      | 8 8      | 8 8                 | 5 10 |
| D9S131        | STR         | 113,043,030                           |                                 | 7 7    | 7 10   | 7 7     | 7 8                  | 7 8                  | 7 7     | 7 7     | 7 3            | 7 10           | 7 7     | 7 3            | 7 7     | 7 8            | 7 5            | 7 8             | 7 9            | 7 9            | 7 8                    | 7 6                    | 7 7      | 7 7      | 7 7      | 7 7                 | 8 9  |
| rs10816965    | SNP         | 113,069,090                           |                                 | G G    | G A    |         | G A                  | G A                  | G G     |         | G A            | G A            | G G     | G A            |         | G A            | G A            | G A             | G A            | G A            | G A                    | G A                    | G G      | G G      |          | A A                 |      |
| rs992886      | SNP         | 113,142,009                           |                                 | G T    | G T    |         | G G                  | G T                  | G G     |         | G G            | G T            | G G     | G T            |         | G T            | G T            | G T             | G G            | G T            | G T                    | G G                    | G G      | G G      | G G      | G T                 |      |
| rs10980448    | SNP         | 113,325,361                           |                                 | T T    | T T    |         | T T                  | T T                  | T T     | T T     | T T            | T T            | T T     | T T            |         | T T            | T C            | T T             | T T            | T T            | T T                    | T T                    | T T      | T T      | T T      | T T                 |      |
| D9S1828       | STR         | 113,332,715                           |                                 | 7 2    | 7 2    |         | 7 2                  | 7 2                  | 7 7     | 7 7     | 7 9            | 7 1            | 7 7     | 7 2            | 7 7     | 7 4            | 7 3            | 7 4             | 7 2            | 7 4            | 7 4                    | 7 1                    | 7 7      | 7 7      | 7 7      | 7 7                 | 9 1  |
| rs10817052    | SNP         | 113,373,423                           |                                 | A G    | A A    |         | A G                  | A G                  | A A     |         | A G            | A G            | A A     | A G            |         | A G            | A G            | A G             | A G            | A G            | A G                    | A A                    | A A      | A A      |          | A G                 |      |
| p.(Ile575Thr) | mutation    | 113,547,944                           |                                 | +-     | +-     | ++      | +-                   | +-                   | ++      | ++      | +-             | +-             | ++      | +-             | ++      | +-             | +-             | +-              | +-             | +-             | +-                     | +-                     | ++       | ++       | ++       | ++                  |      |
| rs1326890     | SNP         | 113,686,353                           |                                 | C T    | C T    |         | C T                  | C C                  | C C     |         | C T            | C T            | C C     | C C            |         | C T            | C T            | C T             | C T            | T T            | C T                    | C T                    | C C      | C C      | C C      | T T                 |      |
| rs17382569    | SNP         | 113,747,491                           |                                 | T C    | T C    |         | T C                  | T C                  | T T     | T T     | T C            | T C            | T T     | T T            | T T     | T C            | T C            | T C             | T C            | T C            | C C                    | T C                    | T C      | T T      | T T      | T T                 | C C  |
| rs10980705    | SNP         | 113,803,185                           |                                 | T T    | T C    |         | T C                  | T C                  | T T     | T T     | T T            | T C            | T T     | T C            |         | T C            | T C            | T C             | T T            | T C            | T C                    | T C                    | T T      | T T      | T T      | T T                 | C C  |
| D9S1683       | STR         | 113,863,336                           |                                 | 1 1    | 1 5    |         | 1 5                  | 1 1                  | 1 1     | 1 1     | 1 2            | 1 5            | 1 1     | 1 4            | 1 1     | 1 4            | 1 2            | 1 4             | 1 2            | 1 2            | 1 4                    | 1 4                    | 1 4      | 1 1      | 1 1      | 1 1                 | 2 1  |
| rs10126017    | SNP         | 113,918,933                           |                                 | G G    | G A    |         | G A                  | G G                  | G G     |         | G G            | G A            | G G     | G A            |         | G G            | G A            | G G             | G A            | G A            | G G                    | G G                    | G G      | G G      |          | A G                 |      |
| D9S1856       | STR         | 114,943,296                           |                                 | 10 8   | 10 4   |         | 10 6                 | 10 1                 | 10 2    | 10 10   | 10 8           | 10 8           | 10 10   | 10 8           | 10 10   | 10 1           | 10 1           | 10 1            | 10 1           | 8 3            | 10 1                   | 10 8                   | 10 10    | 10 10    | 10 10    | 6 6                 |      |
| D9S174        | STR         | 115,821,385                           |                                 | 2 2    | 2 1    |         | 2 2                  | 2 1                  | 2 3     | 2 2     | 2 2            | 2 4            | 2 2     | 2 4            | 2 2     | 2 2            | 2 2            | 2 2             | 2 2            | 2 1            | 2 2                    | 2 2                    | 2 2      | 2 2      | 2 2      | 2 2                 | 3 2  |
| D9S1776       | STR         | 117,959,434                           |                                 | 7 2    | 4 2    |         | 6 11                 | 1 7                  | 1 7     | 6 7     | 1 6            | 6 2            | 1 2     | 1 6            | 4 1     | 1 1            | 1 6            | 1 1             | 1 6            | 1 3            | 1 1                    | 7 2                    | 1 7      | 1 7      | 6 2      | 4 1                 |      |
